# Supplementary material for: Evaluation of five dry particle deposition parameterizations for incorporation into atmospheric transport models
Source: Copernicus journal article supplement (doi:10.5194/gmd-2017-93), 2017-06-01
Supplement: Supplementary file 1 [file gmd-2017-93-supplement.pdf]

# Supplement of Evaluation of five dry particle deposition parameterizations for incorporation into atmospheric transport models

Tanvir R. Khan, Judith A. Perlinger

Correspondence to: Judith A. Perlinger (jperl@mtu.edu)

Table S1. First order sensitivity index ( $Si$ ) with bootstrap confidence intervals ( $CI$ ) of the modeled  $V_d$  for the  $ZOI$  parameterization.

| LUC               | Parameter | $d_p = 0.001 \mu\text{m}$ |          | $d_p = 0.01 \mu\text{m}$ |          | $d_p = 0.1 \mu\text{m}$ |          | $d_p = 1.0 \mu\text{m}$ |          | $d_p = 10 \mu\text{m}$ |          |       |       |       |        |       |
|-------------------|-----------|---------------------------|----------|--------------------------|----------|-------------------------|----------|-------------------------|----------|------------------------|----------|-------|-------|-------|--------|-------|
|                   |           | $Si$                      | 95% $CI$ | $Si$                     | 95% $CI$ | $Si$                    | 95% $CI$ | $Si$                    | 95% $CI$ | $Si$                   | 95% $CI$ |       |       |       |        |       |
| Grass             | $RH$      | 0.000                     | 0.000    | 0.000                    | 0.000    | 0.000                   | 0.000    | 0.000                   | 0.000    | 0.001                  | -0.001   | 0.003 | 0.673 | 0.620 | 0.721  |       |
|                   | $\rho_P$  | 0.000                     | 0.000    | 0.000                    | 0.000    | 0.000                   | 0.000    | 0.000                   | 0.000    | 0.002                  | 0.000    | 0.003 | 0.019 | 0.016 | 0.022  |       |
|                   | $L_O$     | 0.009                     | 0.006    | 0.012                    | 0.002    | -0.001                  | 0.006    | 0.000                   | 0.000    | 0.000                  | 0.000    | 0.000 | 0.000 | 0.000 | 0.000  | 0.000 |
|                   | $z_0$     | 0.044                     | 0.037    | 0.051                    | 0.012    | 0.004                   | 0.020    | 0.000                   | -0.001   | 0.001                  | 0.000    | 0.000 | 0.000 | 0.000 | -0.001 | 0.001 |
|                   | $u^*$     | 0.918                     | 0.884    | 0.948                    | 0.959    | 0.896                   | 1.021    | 0.981                   | 0.949    | 1.011                  | 0.975    | 0.938 | 1.009 | 0.245 | 0.230  | 0.260 |
| Coniferous forest | $RH$      | 0.000                     | 0.000    | 0.000                    | 0.000    | 0.000                   | 0.000    | 0.000                   | 0.000    | 0.001                  | 0.000    | 0.002 | 0.598 | 0.493 | 0.690  |       |
|                   | $\rho_P$  | 0.000                     | 0.000    | 0.000                    | 0.000    | 0.000                   | 0.000    | 0.000                   | 0.000    | 0.002                  | 0.001    | 0.003 | 0.022 | 0.015 | 0.029  |       |
|                   | $L_O$     | 0.260                     | 0.231    | 0.289                    | 0.124    | 0.103                   | 0.147    | 0.005                   | 0.000    | 0.011                  | 0.000    | 0.000 | 0.009 | 0.003 | 0.016  |       |
|                   | $z_0$     | 0.012                     | 0.003    | 0.019                    | 0.003    | -0.002                  | 0.008    | 0.000                   | -0.001   | 0.001                  | 0.000    | 0.000 | 0.000 | 0.000 | -0.001 | 0.001 |
|                   | $u^*$     | 0.674                     | 0.624    | 0.723                    | 0.836    | 0.778                   | 0.893    | 0.972                   | 0.906    | 1.036                  | 0.984    | 0.964 | 1.004 | 0.311 | 0.275  | 0.344 |
| Deciduous forest  | $RH$      | 0.000                     | 0.000    | 0.000                    | 0.000    | 0.000                   | 0.000    | 0.000                   | 0.000    | 0.000                  | -0.001   | 0.002 | 0.844 | 0.782 | 0.903  |       |
|                   | $\rho_P$  | 0.000                     | 0.000    | 0.000                    | 0.000    | 0.000                   | 0.000    | 0.000                   | 0.000    | 0.002                  | 0.000    | 0.003 | 0.019 | 0.016 | 0.022  |       |
|                   | $z_0$     | 0.300                     | 0.283    | 0.316                    | 0.178    | 0.166                   | 0.189    | 0.012                   | 0.009    | 0.014                  | 0.000    | 0.000 | 0.001 | 0.002 | 0.000  | 0.003 |
|                   | $L_O$     | 0.007                     | 0.004    | 0.010                    | 0.002    | 0.000                   | 0.003    | 0.000                   | 0.000    | 0.000                  | 0.000    | 0.000 | 0.000 | 0.000 | 0.000  | 0.000 |
|                   | $u^*$     | 0.671                     | 0.643    | 0.698                    | 0.791    | 0.762                   | 0.817    | 0.972                   | 0.947    | 0.996                  | 0.979    | 0.950 | 1.009 | 0.092 | 0.084  | 0.098 |
| Water             | $RH$      | 0.000                     | 0.000    | 0.000                    | 0.000    | 0.000                   | 0.000    | 0.000                   | 0.000    | 0.000                  | -0.001   | 0.000 | 0.393 | 0.369 | 0.416  |       |
|                   | $\rho_P$  | 0.000                     | 0.000    | 0.000                    | 0.000    | 0.000                   | 0.000    | 0.000                   | 0.000    | 0.002                  | 0.000    | 0.003 | 0.008 | 0.006 | 0.009  |       |
|                   | $L_O$     | 0.000                     | 0.000    | 0.000                    | 0.000    | 0.000                   | 0.000    | 0.000                   | 0.000    | 0.000                  | 0.000    | 0.000 | 0.000 | 0.000 | 0.000  |       |
|                   | $u^*$     | 0.995                     | 0.963    | 1.028                    | 0.995    | 0.962                   | 1.027    | 0.994                   | 0.959    | 1.027                  | 0.983    | 0.960 | 1.005 | 0.559 | 0.543  | 0.575 |
|                   | $z_0$     | 0.000                     | 0.000    | 0.000                    | 0.000    | 0.000                   | 0.000    | 0.000                   | 0.000    | 0.000                  | 0.000    | 0.000 | 0.000 | 0.000 | 0.000  | 0.000 |
| Ice/snow          | $RH$      | 0.000                     | 0.000    | 0.000                    | 0.000    | 0.000                   | 0.000    | 0.000                   | 0.000    | 0.001                  | -0.001   | 0.002 | 0.376 | 0.350 | 0.403  |       |
|                   | $\rho_P$  | 0.000                     | 0.000    | 0.000                    | 0.000    | 0.000                   | 0.000    | 0.000                   | 0.000    | 0.004                  | 0.002    | 0.005 | 0.010 | 0.008 | 0.012  |       |
|                   | $L_O$     | 0.013                     | 0.009    | 0.017                    | 0.006    | 0.003                   | 0.009    | 0.000                   | 0.000    | 0.001                  | 0.000    | 0.000 | 0.002 | 0.001 | 0.003  |       |
|                   | $u^*$     | 0.926                     | 0.893    | 0.959                    | 0.963    | 0.928                   | 0.996    | 0.982                   | 0.956    | 1.007                  | 0.978    | 0.949 | 1.005 | 0.551 | 0.531  | 0.569 |
|                   | $z_0$     | 0.051                     | 0.043    | 0.059                    | 0.026    | 0.020                   | 0.032    | 0.002                   | 0.001    | 0.003                  | 0.000    | 0.000 | 0.000 | 0.010 | 0.007  | 0.012 |

Table S2. First order sensitivity index with bootstrap confidence intervals (*CI*) of the modeled  $V_d$  for the *PZ10* parameterization.

| LUC               | Parameter  | $d_p = 0.001 \mu\text{m}$ |               |       | $d_p = 0.01 \mu\text{m}$ |               |       | $d_p = 0.1 \mu\text{m}$ |               |       | $d_p = 1.0 \mu\text{m}$ |               |       | $d_p = 10 \mu\text{m}$ |               |       |
|-------------------|------------|---------------------------|---------------|-------|--------------------------|---------------|-------|-------------------------|---------------|-------|-------------------------|---------------|-------|------------------------|---------------|-------|
|                   |            | <i>Si</i>                 | 95% <i>CI</i> |       | <i>Si</i>                | 95% <i>CI</i> |       | <i>Si</i>               | 95% <i>CI</i> |       | <i>Si</i>               | 95% <i>CI</i> |       | <i>Si</i>              | 95% <i>CI</i> |       |
| Grass             | <i>RH</i>  | 0.000                     | 0.000         | 0.000 | 0.000                    | 0.000         | 0.000 | 0.000                   | 0.000         | 0.000 | 0.014                   | 0.010         | 0.018 | 0.347                  | 0.320         | 0.372 |
|                   | $\rho_p$   | 0.000                     | 0.000         | 0.000 | 0.000                    | 0.000         | 0.000 | 0.000                   | 0.000         | 0.000 | 0.000                   | 0.000         | 0.001 | 0.012                  | 0.010         | 0.015 |
|                   | $L_O$      | 0.009                     | 0.006         | 0.012 | 0.001                    | 0.000         | 0.003 | -0.001                  | -0.002        | 0.000 | 0.001                   | 0.000         | 0.003 | 0.002                  | 0.000         | 0.003 |
|                   | $z_o$      | 0.034                     | 0.027         | 0.041 | 0.000                    | -0.001        | 0.001 | 0.000                   | 0.000         | 0.000 | 0.000                   | -0.001        | 0.001 | 0.012                  | 0.009         | 0.015 |
|                   | $u_*$      | 0.780                     | 0.751         | 0.809 | 0.050                    | 0.043         | 0.058 | 0.000                   | -0.001        | 0.001 | 0.006                   | 0.004         | 0.009 | 0.244                  | 0.229         | 0.258 |
|                   | <i>LAI</i> | 0.103                     | 0.091         | 0.115 | 0.693                    | 0.664         | 0.722 | 0.553                   | 0.536         | 0.572 | 0.379                   | 0.360         | 0.397 | 0.040                  | 0.035         | 0.045 |
|                   | <i>h</i>   | 0.000                     | 0.000         | 0.001 | 0.001                    | 0.000         | 0.002 | 0.000                   | -0.001        | 0.001 | 0.000                   | -0.001        | 0.002 | 0.000                  | -0.001        | 0.000 |
|                   | <i>d</i>   | 0.000                     | 0.000         | 0.000 | 0.000                    | -0.001        | 0.001 | 0.001                   | 0.000         | 0.001 | 0.000                   | -0.001        | 0.002 | 0.000                  | 0.000         | 0.001 |
| <i>U</i>          | 0.032      | 0.025                     | 0.038         | 0.225 | 0.210                    | 0.242         | 0.408 | 0.393                   | 0.424         | 0.511 | 0.489                   | 0.532         | 0.228 | 0.215                  | 0.240         |       |
| Coniferous forest | <i>RH</i>  | 0.000                     | 0.000         | 0.000 | 0.000                    | 0.000         | 0.000 | 0.000                   | 0.000         | 0.000 | 0.009                   | 0.007         | 0.011 | 0.198                  | 0.179         | 0.215 |
|                   | $\rho_p$   | 0.000                     | 0.000         | 0.000 | 0.000                    | 0.000         | 0.000 | 0.000                   | 0.000         | 0.000 | 0.001                   | 0.000         | 0.001 | 0.004                  | 0.002         | 0.005 |
|                   | $L_O$      | 0.462                     | 0.440         | 0.483 | 0.493                    | 0.468         | 0.514 | 0.375                   | 0.357         | 0.393 | 0.358                   | 0.347         | 0.368 | 0.350                  | 0.334         | 0.366 |
|                   | $z_o$      | 0.011                     | 0.007         | 0.015 | 0.004                    | 0.001         | 0.006 | 0.000                   | 0.000         | 0.001 | 0.001                   | 0.000         | 0.001 | 0.006                  | 0.004         | 0.009 |
|                   | $u_*$      | 0.492                     | 0.466         | 0.517 | 0.164                    | 0.148         | 0.180 | 0.008                   | 0.005         | 0.011 | 0.052                   | 0.047         | 0.057 | 0.372                  | 0.354         | 0.390 |
|                   | <i>LAI</i> | 0.005                     | 0.003         | 0.008 | 0.220                    | 0.202         | 0.240 | 0.313                   | 0.293         | 0.334 | 0.162                   | 0.154         | 0.170 | 0.000                  | -0.001        | 0.001 |
|                   | <i>h</i>   | 0.001                     | 0.000         | 0.002 | 0.001                    | 0.000         | 0.002 | 0.000                   | -0.001        | 0.001 | 0.001                   | 0.000         | 0.001 | 0.000                  | 0.000         | 0.001 |
|                   | <i>d</i>   | 0.000                     | 0.000         | 0.000 | -0.001                   | -0.002        | 0.000 | 0.000                   | -0.001        | 0.001 | 0.001                   | 0.000         | 0.001 | 0.000                  | 0.000         | 0.000 |
| <i>U</i>          | 0.001      | -0.001                    | 0.002         | 0.069 | 0.058                    | 0.078         | 0.217 | 0.199                   | 0.231         | 0.277 | 0.266                   | 0.288         | 0.004 | 0.002                  | 0.006         |       |
| Deciduous forest  | <i>RH</i>  | 0.000                     | 0.000         | 0.000 | 0.000                    | 0.000         | 0.000 | 0.000                   | 0.000         | 0.000 | 0.002                   | 0.001         | 0.003 | 0.280                  | 0.257         | 0.302 |
|                   | $\rho_p$   | 0.000                     | 0.000         | 0.000 | 0.000                    | 0.000         | 0.000 | 0.000                   | 0.000         | 0.000 | 0.000                   | 0.000         | 0.000 | 0.006                  | 0.004         | 0.007 |
|                   | $L_O$      | 0.501                     | 0.484         | 0.518 | 0.458                    | 0.442         | 0.472 | 0.401                   | 0.387         | 0.415 | 0.453                   | 0.441         | 0.464 | 0.339                  | 0.325         | 0.352 |
|                   | $z_o$      | 0.004                     | 0.002         | 0.005 | 0.001                    | 0.000         | 0.002 | 0.000                   | 0.000         | 0.000 | 0.001                   | 0.000         | 0.001 | 0.002                  | 0.001         | 0.004 |
|                   | $u_*$      | 0.390                     | 0.372         | 0.407 | 0.111                    | 0.102         | 0.119 | 0.011                   | 0.008         | 0.014 | 0.081                   | 0.075         | 0.087 | 0.237                  | 0.225         | 0.250 |
|                   | <i>LAI</i> | 0.016                     | 0.012         | 0.019 | 0.252                    | 0.240         | 0.265 | 0.281                   | 0.269         | 0.293 | 0.192                   | 0.183         | 0.199 | 0.005                  | 0.003         | 0.007 |
|                   | <i>h</i>   | 0.000                     | 0.000         | 0.001 | 0.000                    | 0.000         | 0.000 | 0.000                   | 0.000         | 0.000 | 0.000                   | 0.000         | 0.000 | 0.000                  | 0.000         | 0.001 |
|                   | <i>d</i>   | 0.000                     | 0.000         | 0.001 | 0.001                    | 0.000         | 0.002 | 0.002                   | 0.001         | 0.003 | 0.001                   | 0.000         | 0.002 | 0.000                  | 0.000         | 0.000 |
| <i>U</i>          | 0.001      | 0.000                     | 0.002         | 0.031 | 0.026                    | 0.035         | 0.122 | 0.114                   | 0.130         | 0.106 | 0.100                   | 0.112         | 0.005 | 0.003                  | 0.007         |       |
| Water             | <i>RH</i>  | 0.000                     | 0.000         | 0.000 | 0.000                    | 0.000         | 0.000 | -0.001                  | -0.002        | 0.000 | 0.695                   | 0.620         | 0.770 | 0.956                  | 0.877         | 1.025 |
|                   | $\rho_p$   | 0.000                     | 0.000         | 0.000 | 0.000                    | 0.000         | 0.000 | 0.013                   | 0.003         | 0.023 | 0.241                   | 0.194         | 0.285 | 0.016                  | 0.013         | 0.019 |
|                   | $L_O$      | 0.000                     | 0.000         | 0.000 | 0.000                    | 0.000         | 0.000 | 0.000                   | 0.000         | 0.000 | 0.000                   | 0.000         | 0.000 | 0.000                  | 0.000         | 0.000 |
|                   | $u_*$      | 0.994                     | 0.959         | 1.027 | 0.988                    | 0.942         | 1.032 | 0.878                   | 0.640         | 1.121 | -0.001                  | -0.003        | 0.002 | 0.000                  | 0.000         | 0.000 |
| Ice/snow          | <i>RH</i>  | 0.000                     | 0.000         | 0.000 | 0.000                    | 0.000         | 0.000 | 0.000                   | 0.000         | 0.000 | 0.703                   | 0.654         | 0.750 | 0.974                  | 0.912         | 1.034 |
|                   | $\rho_p$   | 0.000                     | 0.000         | 0.000 | 0.000                    | 0.000         | 0.000 | 0.004                   | 0.002         | 0.005 | 0.270                   | 0.244         | 0.296 | 0.015                  | 0.013         | 0.016 |
|                   | $L_O$      | 0.002                     | 0.001         | 0.003 | 0.000                    | 0.000         | 0.000 | 0.000                   | 0.000         | 0.000 | 0.000                   | 0.000         | 0.000 | 0.000                  | 0.000         | 0.000 |
|                   | $u_*$      | 0.962                     | 0.931         | 0.993 | 0.969                    | 0.938         | 1.000 | 0.956                   | 0.913         | 0.998 | 0.000                   | -0.001        | 0.002 | 0.000                  | 0.000         | 0.000 |
|                   | $z_o$      | 0.004                     | 0.002         | 0.006 | 0.000                    | 0.000         | 0.000 | 0.000                   | 0.000         | 0.000 | 0.000                   | 0.000         | 0.000 | 0.000                  | 0.000         | 0.000 |

Table S3. First order sensitivity index ( $Si$ ) with bootstrap confidence intervals ( $CI$ ) of the modeled  $V_d$  for the  $KS12$  parameterization.

| LUC               | Parameter | $d_p = 0.001 \mu\text{m}$ |          |       | $d_p = 0.01 \mu\text{m}$ |          |       | $d_p = 0.1 \mu\text{m}$ |          |       | $d_p = 1.0 \mu\text{m}$ |          |       | $d_p = 10 \mu\text{m}$ |          |       |
|-------------------|-----------|---------------------------|----------|-------|--------------------------|----------|-------|-------------------------|----------|-------|-------------------------|----------|-------|------------------------|----------|-------|
|                   |           | $Si$                      | 95% $CI$ |       | $Si$                     | 95% $CI$ |       | $Si$                    | 95% $CI$ |       | $Si$                    | 95% $CI$ |       | $Si$                   | 95% $CI$ |       |
| Grass             | $RH$      | 0.000                     | 0.000    | 0.000 | 0.000                    | 0.000    | 0.000 | 0.000                   | -0.002   | 0.003 | 0.777                   | 0.731    | 0.822 | 0.816                  | 0.709    | 0.916 |
|                   | $\rho_P$  | 0.000                     | 0.000    | 0.000 | 0.000                    | 0.000    | 0.000 | 0.000                   | 0.000    | 0.000 | 0.039                   | 0.031    | 0.047 | 0.000                  | 0.000    | 0.001 |
|                   | $u_*$     | 0.904                     | 0.832    | 0.976 | 0.904                    | 0.832    | 0.976 | 0.902                   | 0.829    | 0.974 | 0.122                   | 0.106    | 0.138 | 0.009                  | 0.005    | 0.012 |
|                   | $LAI$     | 0.000                     | 0.000    | 0.000 | 0.000                    | 0.000    | 0.000 | 0.000                   | 0.000    | 0.000 | 0.000                   | 0.000    | 0.000 | 0.002                  | -0.001   | 0.003 |
| Coniferous forest | $RH$      | 0.000                     | 0.000    | 0.000 | 0.000                    | 0.000    | 0.000 | 0.000                   | -0.001   | 0.000 | 0.139                   | 0.126    | 0.153 | 0.783                  | 0.709    | 0.849 |
|                   | $\rho_P$  | 0.000                     | 0.000    | 0.000 | 0.000                    | 0.000    | 0.000 | 0.000                   | 0.000    | 0.000 | 0.004                   | 0.002    | 0.007 | 0.002                  | 0.001    | 0.003 |
|                   | $u_*$     | 0.911                     | 0.823    | 0.995 | 0.911                    | 0.823    | 0.995 | 0.943                   | 0.879    | 1.005 | 0.829                   | 0.798    | 0.860 | 0.032                  | 0.029    | 0.035 |
|                   | $LAI$     | 0.000                     | 0.000    | 0.000 | 0.000                    | 0.000    | 0.000 | 0.000                   | 0.000    | 0.000 | 0.000                   | 0.000    | 0.000 | 0.005                  | 0.002    | 0.007 |
| Deciduous forest  | $RH$      | 0.000                     | 0.000    | 0.000 | 0.000                    | 0.000    | 0.000 | 0.000                   | -0.001   | 0.000 | 0.629                   | 0.571    | 0.686 | 0.934                  | 0.856    | 1.004 |
|                   | $\rho_P$  | 0.000                     | 0.000    | 0.000 | 0.000                    | 0.000    | 0.000 | 0.000                   | 0.000    | 0.000 | 0.243                   | 0.206    | 0.277 | 0.012                  | 0.010    | 0.014 |
|                   | $u_*$     | 0.944                     | 0.880    | 1.005 | 0.944                    | 0.880    | 1.005 | 0.967                   | 0.929    | 1.005 | 0.054                   | 0.037    | 0.072 | 0.002                  | 0.000    | 0.004 |
|                   | $LAI$     | 0.000                     | 0.000    | 0.000 | 0.000                    | 0.000    | 0.000 | 0.000                   | 0.000    | 0.000 | 0.000                   | 0.000    | 0.000 | 0.000                  | -0.001   | 0.001 |
| Ice/snow          | $RH$      | 0.000                     | 0.000    | 0.000 | 0.000                    | 0.000    | 0.000 | 0.001                   | -0.001   | 0.002 | 0.302                   | 0.287    | 0.316 | 0.848                  | 0.789    | 0.899 |
|                   | $\rho_P$  | 0.000                     | 0.000    | 0.000 | 0.000                    | 0.000    | 0.000 | 0.000                   | 0.000    | 0.000 | 0.001                   | 0.000    | 0.001 | 0.002                  | 0.001    | 0.003 |
|                   | $u_*$     | 0.905                     | 0.840    | 0.972 | 0.905                    | 0.840    | 0.972 | 0.902                   | 0.836    | 0.970 | 0.614                   | 0.595    | 0.632 | 0.022                  | 0.020    | 0.024 |

Table S4. First order sensitivity index ( $Si$ ) with bootstrap confidence intervals ( $CI$ ) of the modeled  $V_d$  for the  $ZH14$  parameterization.

| LUC               | Parameter | $d_p = 0.001 \mu\text{m}$ |          |       | $d_p = 0.01 \mu\text{m}$ |          |       | $d_p = 0.1 \mu\text{m}$ |          |       | $d_p = 1.0 \mu\text{m}$ |          |       | $d_p = 10 \mu\text{m}$ |          |       |
|-------------------|-----------|---------------------------|----------|-------|--------------------------|----------|-------|-------------------------|----------|-------|-------------------------|----------|-------|------------------------|----------|-------|
|                   |           | $Si$                      | 95% $CI$ |       | $Si$                     | 95% $CI$ |       | $Si$                    | 95% $CI$ |       | $Si$                    | 95% $CI$ |       | $Si$                   | 95% $CI$ |       |
| Grass             | $RH$      | 0.000                     | 0.000    | 0.000 | 0.000                    | 0.000    | 0.000 | 0.000                   | 0.000    | 0.000 | 0.001                   | 0.000    | 0.002 | 0.940                  | 0.847    | 1.014 |
|                   | $\rho_P$  | 0.000                     | 0.000    | 0.000 | 0.000                    | 0.000    | 0.000 | 0.000                   | 0.000    | 0.000 | 0.001                   | 0.000    | 0.001 | 0.006                  | 0.004    | 0.008 |
|                   | $u^*$     | 1.002                     | 0.973    | 1.033 | 1.002                    | 0.973    | 1.033 | 1.002                   | 0.973    | 1.033 | 1.000                   | 0.967    | 1.032 | 0.000                  | 0.000    | 0.000 |
|                   | $L$       | 0.000                     | 0.000    | 0.000 | 0.000                    | 0.000    | 0.000 | 0.000                   | 0.000    | 0.000 | 0.000                   | 0.000    | 0.000 | 0.000                  | 0.000    | 0.000 |
|                   | $z_0$     | 0.000                     | 0.000    | 0.000 | 0.000                    | 0.000    | 0.000 | 0.000                   | 0.000    | 0.000 | 0.000                   | 0.000    | 0.001 | 0.000                  | 0.000    | 0.000 |
| Coniferous forest | $RH$      | 0.000                     | 0.000    | 0.000 | 0.000                    | 0.000    | 0.000 | 0.000                   | 0.000    | 0.000 | 0.000                   | 0.000    | 0.001 | 0.420                  | 0.382    | 0.456 |
|                   | $\rho_P$  | 0.000                     | 0.000    | 0.000 | 0.000                    | 0.000    | 0.000 | 0.000                   | 0.000    | 0.000 | 0.000                   | 0.000    | 0.000 | 0.006                  | 0.004    | 0.007 |
|                   | $u^*$     | 0.988                     | 0.960    | 1.016 | 0.988                    | 0.960    | 1.016 | 0.988                   | 0.960    | 1.016 | 0.971                   | 0.947    | 0.994 | 0.341                  | 0.325    | 0.356 |
|                   | $L$       | 0.002                     | 0.001    | 0.003 | 0.002                    | 0.000    | 0.003 | 0.002                   | 0.000    | 0.003 | 0.004                   | 0.002    | 0.005 | 0.141                  | 0.131    | 0.150 |
|                   | $z_0$     | 0.000                     | 0.000    | 0.000 | 0.000                    | 0.000    | 0.000 | 0.000                   | 0.000    | 0.000 | 0.000                   | 0.000    | 0.000 | 0.012                  | 0.009    | 0.014 |
| Deciduous forest  | $RH$      | 0.000                     | 0.000    | 0.000 | 0.000                    | 0.000    | 0.000 | 0.000                   | 0.000    | 0.000 | 0.000                   | 0.000    | 0.001 | 0.634                  | 0.585    | 0.675 |
|                   | $\rho_P$  | 0.000                     | 0.000    | 0.000 | 0.000                    | 0.000    | 0.000 | 0.000                   | 0.000    | 0.000 | 0.000                   | 0.000    | 0.001 | 0.004                  | 0.003    | 0.006 |
|                   | $u^*$     | 0.988                     | 0.962    | 1.011 | 0.988                    | 0.962    | 1.011 | 0.988                   | 0.962    | 1.011 | 0.987                   | 0.960    | 1.012 | 0.185                  | 0.174    | 0.195 |
|                   | $L$       | 0.006                     | 0.004    | 0.008 | 0.006                    | 0.004    | 0.008 | 0.006                   | 0.004    | 0.008 | 0.006                   | 0.004    | 0.008 | 0.015                  | 0.012    | 0.018 |
|                   | $z_0$     | 0.000                     | 0.000    | 0.000 | 0.000                    | 0.000    | 0.000 | 0.000                   | 0.000    | 0.000 | 0.000                   | 0.000    | 0.000 | 0.000                  | 0.000    | 0.000 |
|                   | $LAI$     |                           |          |       |                          |          |       |                         |          |       |                         |          |       | 0.053                  | 0.048    | 0.057 |
| Water             | $RH$      | 0.000                     | 0.000    | 0.000 | 0.000                    | 0.000    | 0.000 | 0.000                   | 0.000    | 0.000 | 0.000                   | 0.000    | 0.001 | 0.465                  | 0.429    | 0.499 |
|                   | $\rho_P$  | 0.000                     | 0.000    | 0.000 | 0.000                    | 0.000    | 0.000 | 0.000                   | 0.000    | 0.000 | 0.000                   | 0.000    | 0.001 | 0.008                  | 0.005    | 0.010 |
|                   | $L$       | 0.000                     | 0.000    | 0.000 | 0.000                    | 0.000    | 0.000 | 0.000                   | 0.000    | 0.000 | 0.000                   | 0.000    | 0.000 | 0.000                  | 0.000    | 0.000 |
|                   | $u^*$     | 0.981                     | 0.954    | 1.010 | 0.981                    | 0.954    | 1.010 | 0.981                   | 0.953    | 1.010 | 0.980                   | 0.952    | 1.010 | 0.499                  | 0.480    | 0.517 |
| Ice/snow          | $RH$      | 0.000                     | 0.000    | 0.000 | 0.000                    | 0.000    | 0.000 | 0.000                   | 0.000    | 0.000 | 0.000                   | 0.000    | 0.001 | 0.407                  | 0.378    | 0.433 |
|                   | $\rho_P$  | 0.000                     | 0.000    | 0.000 | 0.000                    | 0.000    | 0.000 | 0.000                   | 0.000    | 0.000 | 0.000                   | 0.000    | 0.000 | 0.005                  | 0.003    | 0.007 |
|                   | $L$       | 0.000                     | 0.000    | 0.000 | 0.000                    | 0.000    | 0.000 | 0.000                   | 0.000    | 0.000 | 0.000                   | 0.000    | 0.000 | 0.004                  | 0.002    | 0.005 |
|                   | $u^*$     | 0.984                     | 0.959    | 1.008 | 0.984                    | 0.959    | 1.008 | 0.984                   | 0.959    | 1.008 | 0.986                   | 0.964    | 1.006 | 0.548                  | 0.531    | 0.564 |
|                   | $z_0$     | 0.001                     | 0.000    | 0.001 | 0.001                    | 0.000    | 0.001 | 0.001                   | 0.000    | 0.001 | 0.000                   | 0.000    | 0.001 | 0.014                  | 0.011    | 0.017 |

Table S5. First order sensitivity index ( $Si$ ) with bootstrap confidence intervals ( $CI$ ) of the modeled  $V_d$  for the  $ZS14$  parameterization.

| LUC   | Parameter | $d_p = 0.001 \mu\text{m}$ |          |       | $d_p = 0.01 \mu\text{m}$ |          |       | $d_p = 0.1 \mu\text{m}$ |          |       | $d_p = 1.0 \mu\text{m}$ |          |       | $d_p = 10 \mu\text{m}$ |          |       |
|-------|-----------|---------------------------|----------|-------|--------------------------|----------|-------|-------------------------|----------|-------|-------------------------|----------|-------|------------------------|----------|-------|
|       |           | $Si$                      | 95% $CI$ |       | $Si$                     | 95% $CI$ |       | $Si$                    | 95% $CI$ |       | $Si$                    | 95% $CI$ |       | $Si$                   | 95% $CI$ |       |
| Plant | $RH$      | 0.000                     | 0.000    | 0.000 | 0.000                    | 0.000    | 0.000 | 0.000                   | 0.000    | 0.000 | 0.006                   | 0.004    | 0.008 | 0.071                  | 0.060    | 0.085 |
|       | $\rho_P$  | 0.000                     | 0.000    | 0.000 | 0.000                    | 0.000    | 0.000 | 0.000                   | 0.000    | 0.000 | 0.000                   | 0.000    | 0.000 | 0.000                  | -0.001   | 0.002 |
|       | $u^*$     | 0.436                     | 0.410    | 0.463 | 0.347                    | 0.324    | 0.369 | 0.576                   | 0.547    | 0.603 | 0.611                   | 0.580    | 0.640 | 0.750                  | 0.707    | 0.789 |
|       | $U$       | 0.464                     | 0.430    | 0.498 | 0.607                    | 0.568    | 0.643 | 0.306                   | 0.282    | 0.329 | 0.275                   | 0.252    | 0.297 | 0.145                  | 0.127    | 0.163 |
| Water | $RH$      | 0.000                     | 0.000    | 0.000 | 0.000                    | 0.000    | 0.000 | 0.000                   | 0.000    | 0.000 | 0.003                   | 0.001    | 0.004 | 0.001                  | 0.000    | 0.003 |
|       | $\rho_P$  | 0.000                     | 0.000    | 0.000 | 0.000                    | 0.000    | 0.000 | 0.000                   | 0.000    | 0.000 | 0.000                   | 0.000    | 0.000 | 0.000                  | 0.000    | 0.001 |
|       | $u^*$     | 0.991                     | 0.958    | 1.023 | 0.966                    | 0.935    | 0.997 | 0.989                   | 0.963    | 1.014 | 0.988                   | 0.961    | 1.015 | 0.989                  | 0.956    | 1.020 |
|       | $U$       | 0.000                     | 0.000    | 0.001 | 0.027                    | 0.022    | 0.032 | 0.000                   | 0.000    | 0.000 | 0.000                   | 0.000    | 0.000 | 0.000                  | 0.000    | 3.180 |
