# Supplementary material for: Evaluation of five dry particle deposition parameterizations for incorporation into atmospheric transport models
Source: Copernicus journal article supplement (doi:10.5194/gmd-2017-93), 2017-06-01
Supplement: Supplementary file [file gmd-2017-93-AC1-supplement.pdf]

## Short Comments Received from GMD Executive Editor

We thank Lutz Gross for the comments. We have revised the manuscript following his comments. Our responses are compiled below (**SC: short comment**, **AR: author's response**):

**SC:** I would like to suggest the following changes to your manuscript for a revised submission:

- upload your program code and input files (if applicable) as a supplement
- clarify the license under which the reader can use the supplementary program code, see also [https://en.wikipedia.org/wiki/Creative Commons license](https://en.wikipedia.org/wiki/Creative_Commons_license) (this should be done in the section “Code availability” in your manuscript but it is also recommended to add to the header of any script)
- State in the section “Code availability” :
  - a persistent access to the code (preferable as supplement)
  - license of use
  - the R versions required to run the scripts
  - the R version used to create the results shown in the paper

**AR:** We have included the codes in the supplement. We have reflected this change in the ‘code availability’ by including the license under which the codes can be used, the R version(s) that was used and is required to run the scripts.

The **code availability** section in the revised manuscript now reads:

“The R scripts used in this study are available in the supplemental material and can be found online at: <https://osf.io/a6q97/>. The R version 3.2.4 was used to create the scripts. A similar or higher version of R is required to run the scripts. The codes can be used, distributed, and reproduced for all non-commercial use under the terms of the Creative Commons Attribution-Noncommercial 3.0 Unported License (<http://creativecommons.org/licenses/by-nc/3.0/>), provided the original work is properly cited.”
